# Supplementary material for: Drug Prescriptions during Pregnancy in Lombardy: Temporal Trends and the Impact of the Onset of the COVID-19 Pandemic
Source: MDPI journal article supplement (doi:10.3390/pharma2030021), 2023-08-01
Supplement: s1 [file s1]

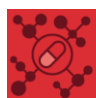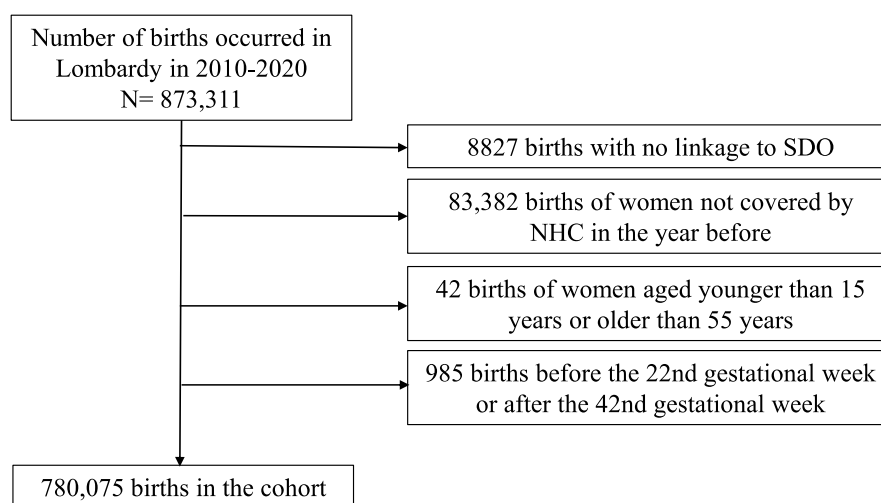

**Figure S1.** Flowchart of inclusion and exclusion criteria in the study cohort. Lombardy Region, 2010-2020.

**Table S1.** Selected maternal characteristics. Lombardy, Italy, 2010-2020. .

| Maternal Characteristics                      | Deliveries |      |
|-----------------------------------------------|------------|------|
|                                               | <i>n</i>   | %    |
| Maternal age (years)                          |            |      |
| <30                                           | 214,305    | 27.5 |
| 30-34                                         | 276,218    | 35.4 |
| 35-39                                         | 222,130    | 28.5 |
| >39                                           | 67,422     | 8.6  |
| Nationality                                   |            |      |
| Italian                                       | 598,227    | 76.7 |
| Not Italian                                   | 181,848    | 23.3 |
| Educational level                             |            |      |
| University                                    | 252,986    | 32.4 |
| High school                                   | 340,901    | 43.7 |
| Middle/primary school                         | 183,429    | 23.5 |
| Parity                                        |            |      |
| Nulliparae                                    | 383,050    | 49.1 |
| Pluriparae                                    | 397,025    | 50.9 |
| ART                                           |            |      |
| No                                            | 750,313    | 96.2 |
| Yes                                           | 26,678     | 3.4  |
| Gestational age at birth (weeks)              |            |      |
| ≥37                                           | 728,844    | 93.4 |
| <37                                           | 51,231     | 6.6  |
| At least 1 drug prescription during pregnancy | 497,515    | 63.8 |

**Table S2.** Drug prescription patterns across three trimesters of pregnancy. Lombardy, Italy, 2010-2020.

| 1st Trimester | 2nd Trimester | 3rd Trimester | Deliveries |      |
|---------------|---------------|---------------|------------|------|
|               |               |               | <i>n</i>   | %    |
|               |               |               | 114,087    | 14.6 |
|               |               |               | 56,788     | 7.3  |

---

|  |  |        |      |
|--|--|--------|------|
|  |  | 84,367 | 10.8 |
|  |  | 51,630 | 6.6  |
|  |  | 54,454 | 7.0  |
|  |  | 44,680 | 5.7  |
|  |  | 90,062 | 11.6 |

---
